1 **A robust, highly multiplexed mass spectrometry assay to identify SARS-CoV-2 variants**

2

3 Matthew M. Hernandez<sup>1,#</sup>, Radhika Banu<sup>1</sup>, Paras Shrestha<sup>1</sup>, Ana S. Gonzalez-Reiche<sup>2</sup>, Adriana van de  
4 Guchte<sup>2</sup>, Keith Farrugia<sup>2</sup>, Robert Sebra<sup>2,3,4,5</sup>, Mount Sinai PSP Study Group<sup>1,2,6,7</sup>, Melissa R. Gitman<sup>1</sup>,  
5 Michael D. Nowak<sup>1</sup>, Carlos Cordon-Cardo<sup>1</sup>, Viviana Simon<sup>1,6,7,8,9</sup>, Harm van Bakel<sup>2,3</sup>, Emilia Mia  
6 Sordillo<sup>1</sup>, Nicolas Luna<sup>10</sup>, Angie Ramirez<sup>10</sup>, Sergio Andres Castañeda<sup>10</sup>, Luz Helena Patiño<sup>10</sup>, Nathalia  
7 Ballesteros<sup>10</sup>, Marina Muñoz<sup>10</sup>, Juan David Ramírez<sup>1,10</sup>, Alberto E. Paniz-Mondolfi<sup>1,#</sup>

8

9 **Affiliations:**

10 <sup>1</sup> Department of Pathology, Molecular, and Cell-Based Medicine, Icahn School of Medicine at Mount  
11 Sinai, New York, NY 10029, USA

12 <sup>2</sup> Department of Genetics and Genomic Sciences, Icahn School of Medicine at Mount Sinai, New York,  
13 NY 10029, USA

14 <sup>3</sup> Icahn Genomics Institute, Icahn School of Medicine at Mount Sinai, New York, NY 10029, USA

15 <sup>4</sup> Black Family Stem Cell Institute, Icahn School of Medicine at Mount Sinai, New York, NY 10029,  
16 USA

17 <sup>5</sup> Sema4, a Mount Sinai venture, Stamford, CT 06902, USA

18 <sup>6</sup> Department of Microbiology, Icahn School of Medicine at Mount Sinai, New York, NY 10029, USA

19 <sup>7</sup> Center for Vaccine Research and Pandemic Preparedness (C-VARPP), Icahn School of Medicine at  
20 Mount Sinai, New York, NY, USA

21 <sup>8</sup> Division of Infectious Diseases, Department of Medicine, Icahn School of Medicine at Mount Sinai,  
22 New York, NY 10029, USA

23 <sup>9</sup> The Global Health and Emerging Pathogens Institute, Icahn School of Medicine at Mount Sinai, New  
24 York, NY 10029, USA

25 <sup>10</sup> Centro de Investigaciones en Microbiología y Biotecnología-UR (CIMBIUR), Facultad de Ciencias  
26 Naturales, Universidad del Rosario, Bogotá, Colombia.

27

28 # Corresponding authors: matthew.hernandez@mssm.edu, alberto.paniz-mondolfi@mountsinai.org;  
29 1428 Madison Avenue, Suite B2-15, New York, NY, 10029

30

31 Mount Sinai PSP Study Group (in alphabetical order): Hala Alshammary, Angela A. Amoako,  
32 Mahmoud H. Awawda, Christian Cognigni, Aria Rooker, Jose Polanco, Levy A. Sominsky, Komal  
33 Srivastava, Huanzhi Shi, Liyong Cao, Feng Chen, Jian Zhang, Zain Khalil

34

35 **Running head:** RT-PCR/MALDI-TOF SARS-CoV-2 variant panel

36 **Keywords:** RT-PCR, MALDI-TOF, SARS-CoV-2, variant panel, multiplex, Omicron

37

38 **Abstract**

39 Severe acute respiratory syndrome coronavirus 2 (SARS-CoV-2) variants are characterized by  
40 differences in transmissibility and response to therapeutics. Therefore, discriminating among them is  
41 vital for surveillance, infection prevention, and patient care. While whole viral genome sequencing  
42 (WGS) is the “gold standard” for variant identification, molecular variant panels have become  
43 increasingly available. Most, however, are based on limited targets and have not undergone  
44 comprehensive evaluation. We assessed the diagnostic performance of the highly multiplexed Agena  
45 MassARRAY<sup>®</sup> SARS-CoV-2 Variant Panel v3 to identify variants in a diverse set of 391 SARS-CoV-2  
46 clinical RNA specimens collected across our health systems in New York City, USA as well as in  
47 Bogotá, Colombia (September 2, 2020 – March 2, 2022). We demonstrate almost perfect levels of  
48 interrater agreement between this assay and WGS for 9 of 11 variant calls ( $\kappa \geq 0.856$ ) and 25 of 30  
49 targets ( $\kappa \geq 0.820$ ) tested on the panel. The assay had a high diagnostic sensitivity ( $\geq 93.67\%$ ) for  
50 contemporary variants (e.g., Iota, Alpha, Delta, Omicron [BA.1 sublineage]) and a high diagnostic  
51 specificity for all 11 variants ( $\geq 96.15\%$ ) and all 30 targets ( $\geq 94.34\%$ ) tested. Moreover, we highlight  
52 distinct target patterns that can be utilized to identify variants not yet defined on the panel including the  
53 Omicron BA.2 and other sublineages. These findings exemplify the power of highly multiplexed  
54 diagnostic panels to accurately call variants and the potential for target result signatures to elucidate new  
55 ones.

56

57

58 **Importance**

59           The continued circulation of SARS-CoV-2 amidst limited surveillance efforts and inconsistent  
60 vaccination of populations has resulted in emergence of variants that uniquely impact public health  
61 systems. Thus, in conjunction with functional and clinical studies, continuous detection and  
62 identification are quintessential to inform diagnostic and public health measures. Furthermore, until  
63 WGS becomes more accessible in the clinical microbiology laboratory, the ideal assay for identifying  
64 variants must be robust, provide high resolution, and be adaptable to the evolving nature of viruses like  
65 SARS-CoV-2. Here, we highlight the diagnostic capabilities of a highly multiplexed commercial assay  
66 to identify diverse SARS-CoV-2 lineages that circulated at over September 2, 2020 – March 2, 2022  
67 among patients seeking care at our health systems. This assay demonstrates variant-specific signatures  
68 of nucleotide/amino acid polymorphisms and underscores its utility for detection of contemporary and  
69 emerging SARS-CoV-2 variants of concern.

70

## 71 **Introduction**

72           Since the onset of the coronavirus disease 2019 (COVID-19) pandemic, suboptimal surveillance  
73 and diagnostic efforts have not been able to prevent the rapid, unchecked spread of severe acute  
74 respiratory syndrome coronavirus 2 (SARS-CoV-2) (1–4). In conjunction with various factors (e.g.,  
75 variable healthcare access, limitations to effective infection prevention efforts), continued spread has led  
76 to the emergence of viral variants characterized by increased genomic diversity including the most  
77 recent Omicron (B.1.1.529) variant and its sublineages (5–8). This poses a unique challenge to  
78 healthcare systems and diagnostic laboratories, alike, as genomic variation has the potential to impact  
79 viral fitness (5, 9), disease pathogenesis (10–12), response to therapeutics (e.g., antibodies) (5, 13, 14),  
80 and molecular target detection (15–17).

81           Ideally, SARS-CoV-2 diagnostic assays should be scalable to test increased clinical specimens  
82 and should be robust enough to accommodate genomic variation in viruses over time. Although  
83 improved technologies have made high-throughput platforms more available, most are limited in the  
84 level of multiplexing and, thus, risk target dropout and failing to capture infected individuals. Indeed,  
85 current nucleic acid amplification tests (e.g., reverse-transcription polymerase chain reaction (RT-PCR))  
86 largely utilize 1-3 targets to detect (e.g., presence/absence) SARS-CoV-2 nucleic acids. Moreover, as  
87 new variants have emerged, diagnostic panels are based on targets designed for detection of nucleotide  
88 changes that yield specific amino acid substitutions and call variants based on distinct target result  
89 combinations (18–20). However, most of these assays distinguish viral variants through result patterns  
90 of 3-9 molecular targets across multiple reaction wells (20–28), which are constrained to distinguishing  
91 current circulating variants but may not be sufficient to distinguish nascent, increasingly divergent  
92 variants.

93 Whole viral genome sequencing (WGS) has, therefore, largely served as the “gold standard” for  
94 pathogen genomic surveillance. Still, this methodology is not realistic for most diagnostic laboratories as  
95 it requires staff with bioinformatic expertise, bioinformatics infrastructure, is relatively expensive and  
96 restricted in lower income countries (LICs) and lower middle income countries (LMCs) (29, 30).  
97 Therefore, there is great potential for highly multiplexed assays that target an expansive repertoire of  
98 polymorphisms. Currently, these platforms are rare in number (31, 32) and most have not yet been  
99 evaluated for their diagnostic capabilities in the clinical setting.

100 Here, we recovered 391 SARS-CoV-2 viral RNA from clinical specimens collected from  
101 infected individuals who presented for testing at the Mount Sinai Health System (MSHS) in New York  
102 City (NYC) and at the Universidad del Rosario in Bogotá, Colombia from September 2, 2020 – March  
103 2, 2022. These specimens had previously undergone WGS for epidemiologic surveillance, and we used  
104 this data as a benchmark to evaluate the diagnostic performance of the Agena MassARRAY<sup>®</sup> SARS-  
105 CoV-2 Variant Panel v3 (research use only, RUO). We tested this highly diverse set of viral variants to  
106 interrogate the level of agreement and diagnostic sensitivity and specificity across 12 distinct variants on  
107 the panel and 30 distinct polymorphic targets in the *Spike (S)* gene region. We demonstrate a high level  
108 of assay agreement and high levels of diagnostic sensitivity and specificity across most variant and  
109 individual targets tested. Furthermore, we highlight the utility of the variant panel to elucidate undefined  
110 or emergent variants based on unique target result signatures.

111

## 112 **Materials and Methods**

### 113 *Ethics statement*

114 For specimens obtained through routine testing at MSHS, the Mount Sinai Pathogen Surveillance  
115 Program was reviewed and approved by the Human Research Protection Program at the Icahn School of  
116 Medicine at Mount Sinai (ISMMS) (HS#13-00981). For specimens from Colombia, the study was  
117 reviewed and approved by the ethics Committee from Universidad del Rosario in Bogotá, Colombia  
118 (Act number DVO005 1550-CV1499). This study was performed following the Declaration of Helsinki  
119 and its later amendments, and all patient data was anonymized to minimize risk to participants.

120

### 121 *SARS-CoV-2 specimen collection and testing*

122 Residual viral RNA from a total of 391 specimens that were previously collected from  
123 September 2, 2020 – March 2, 2022 for routine diagnostic testing were utilized for this study.

124 Specifically, 349 upper respiratory tract (e.g., nasopharyngeal, anterior nares) and saliva  
125 (September 2, 2020 – March 2, 2022) specimens were originally collected for SARS-CoV-2 diagnostic  
126 testing in the Molecular Microbiology Laboratory of the MSHS Clinical Laboratory, which is certified  
127 under Clinical Laboratory Improvement Amendments of 1988, 42 U.S.C. §263a and meets requirements  
128 to perform high-complexity tests were eligible for inclusion in this study. Viral RNA was extracted from  
129 300µL of each specimen using the Viral DNA/RNA 300 Kit H96 (PerkinElmer, CMG□1033□S) on the  
130 automated chemagic™ 360 instrument (PerkinElmer, 2024□0020) per manufacturer's protocol as  
131 previously described (33, 34). After routine testing and extraction, viral RNA was stored at -80°C prior  
132 to recovery for testing in this study.

133 Forty-two nasopharyngeal specimens were collected from patients from the Valle del Cauca  
134 department for SARS-CoV-2 testing at Universidad del Rosario from March 29, 2021 – July 28, 2021.

135 Details of processing and SARS-CoV-2 testing of upper respiratory specimens have been described  
136 previously (35). After diagnostic testing, residual viral RNA was also stored at -80°C prior to recovery  
137 for testing in this study.

138

### 139 *SARS-CoV-2 sequencing, assembly, and phylogenetics*

140 As part of the ongoing Mount Sinai Pathogen Surveillance Program, SARS-CoV-2 viral RNA  
141 from MSHS underwent RT-PCR and next-generation sequencing followed by genome assembly and  
142 lineage assignment using a phylogenetic-based nomenclature as described by Rambaut et al. (36) using  
143 the Pangolin v4.0.6 tool and PANGO-v1.2.81 nomenclature scheme ([https://github.com/cov-](https://github.com/cov-lineages/pangolin)  
144 [lineages/pangolin](https://github.com/cov-lineages/pangolin)) as previously described (4, 37).

145 Sequence libraries were prepared from RNA from Colombian specimens using the ARTIC  
146 Network protocol (<https://artic.network/ncov-2019> accessed on 1 February 2021) as previously  
147 described (38). Briefly, long-read Oxford Nanopore MinION sequencing was conducted by the  
148 MinKNOW application (v1.5.5). Raw Fast5 files were base called and demultiplexed using Guppy.  
149 Reads were filtered to remove possible chimeric reads, and genome assemblies were obtained following  
150 the MinION pipeline described in the ARTIC bioinformatics pipeline ([https://artic.network/ncov-](https://artic.network/ncov-2019/ncov2019-bioinformatics-sop.html)  
151 [2019/ncov2019-bioinformatics-sop.html](https://artic.network/ncov-2019/ncov2019-bioinformatics-sop.html) accessed on 1 February 2021).

152 Of 391 specimens, 381 single variant consensus genome sequences were identified, and the  
153 remaining 10 yielded mixed assemblies and, thus, a putative (inconclusive) consensus genome sequence  
154 was generated. All FASTA consensus genome sequences underwent mutation calling and phylogenetic  
155 lineage assignment by the Nextclade Web Interface (<https://clades.nextstrain.org/>, last accessed 4/18/22)  
156 and the Pangolin COVID-19 Lineage Assigner (<https://pangolin.cog-uk.io/>, last accessed 4/18/22).

157



158 *SARS-CoV-2 Variant Panel Testing*

159 We recovered residual viral RNA from all 391 specimens from -80°C storage to undergo testing  
160 on the Agena MassARRAY<sup>®</sup> SARS-CoV-2 Variant Panel v3  
161 ([https://www.agenabio.com/products/panel/coronavirus-sars-cov-2-variant-detection-research-](https://www.agenabio.com/products/panel/coronavirus-sars-cov-2-variant-detection-research-panel/#:~:text=The%20MassARRAY%C2%AE%20SARS%2DCoV,SARS%2DCoV%2D2%20variants)  
162 [panel/#:~:text=The%20MassARRAY%C2%AE%20SARS%2DCoV,SARS%2DCoV%2D2%20variants](https://www.agenabio.com/products/panel/coronavirus-sars-cov-2-variant-detection-research-panel/#:~:text=The%20MassARRAY%C2%AE%20SARS%2DCoV,SARS%2DCoV%2D2%20variants)  
163 ., last accessed 4/25/22). The panel combines RT-PCR and matrix-assisted laser desorption/ionization  
164 time-of-flight (MALDI-TOF) to detect targeted viral polymorphisms in the Spike (S) gene (**Fig. 1A**). It  
165 consists of a two-well multiplex qualitative assay that utilizes primer mixes that target a total of 36  
166 polymorphisms which – in various signature combinations – reflect 16 distinct SARS-CoV-2 variants  
167 (**Fig. 1B**).

168

169 RT-PCR and generation of analytes

170 Per manufacturer's protocol, for each specimen, viral RNA underwent RT-PCR by combining  
171 0.355µL nuclease-free water, 1µL RT-PCR Mastermix, 0.125µL RNase Inhibitor, and 0.020µL of  
172 MMLV Enzyme in each of two wells in a 384-well format. To one well, 0.500µL SARS-CoV-2 Variant  
173 v3 PCR Primer P01 was added, and to the second, 0.500µL SARS-CoV-2 Variant v3 PCR Primer P02  
174 was added. Three microliters of sample RNA were added to each of the two wells for a final RT-PCR  
175 reaction volume of 5µL. Four positive controls of synthetic SARS-CoV-2 RNA (Twist Synthetic SARS-  
176 CoV-2 RNA Controls 1 (MT007544.1, #102019), 14 (B.1.1.7\_710528, #103907), 16 (EPI\_ISL\_678597,  
177 #104043), and 17 (EPI\_ISL\_792683, #104044)) were diluted in a mixture of nuclease-free water  
178 (Ambion #AM9916) and human liver total RNA (Takara Bio #636531) and included in each RT-PCR  
179 run. This resulted in a total of 8 wells with 1,500 SARS-CoV-2 genome copies/well and 10ng human

180 liver total RNA/well for all positive controls. A negative control of nuclease-free water was included in  
181 each RT-PCR run. RT-PCR thermocycler conditions are depicted in **Table S1**.

182 RT-PCR products underwent reaction with shrimp alkaline phosphatase (SAP). Directly to each  
183 RT-PCR well, a mastermix of 1.53 $\mu$ L nuclease-free water, 0.17 $\mu$ L SAP Buffer, and 0.30 $\mu$ L SAP was  
184 added for a total volume of 7 $\mu$ L including 2 $\mu$ L of SAP mastermix. SAP reaction thermocycler  
185 conditions are described in **Table S2**.

186 Extension products were generated with SARS-CoV-2 Variant v3 Extend Primers using the  
187 iPLEX<sup>®</sup> Pro Reagent Set. Mastermixes were created as follows: 1.06 $\mu$ L nuclease-free water, 0.20 $\mu$ L  
188 iPLEX Buffer Plus, GPR; 0.20 $\mu$ L iPLEX Termination Mix, 0.04 $\mu$ L iPLEX Pro Enzyme, and 0.50 $\mu$ L  
189 MassARRAY<sup>®</sup> SARS-CoV-2 Variant v3 Extend Primers (E01 or E02. Two microliters of E01  
190 mastermix were added to each well amplified by P01 primers, and 2 $\mu$ L E02 mastermix was added to  
191 each well amplified by P02 primers for the total extension reaction volume of 9 $\mu$ L. Extension  
192 thermocycler conditions are detailed in **Table S3**.

193

#### 194 Analyte dispensing, data acquisition, and data analyses

195 Twenty microliters of nuclease-free water were added to each well prior to desalting and  
196 dispensing in the MassARRAY<sup>®</sup> System for data acquisition. Analytes were desalted using suspended  
197 clean resin (Agena #08060) and dispensed onto SpectroCHIP<sup>®</sup> Arrays (CPM-384) for data acquisition  
198 with the MassARRAY<sup>®</sup> Analyzer with Chip Prep Module 384 as per manufacturer's protocol.  
199 Instrument settings for iPLEX Pro genotyping panels were used with Genotype+Area selected as the  
200 Process Method. After data acquisition, MassARRAY<sup>®</sup> Typer Analyzer was used to analyze data and  
201 generate variant report output results for each specimen. All variant target results and individual target  
202 results for each specimen are depicted in **Table S4**.

203 *Diagnostic performance analyses*

204 To compare performance of the panel to the WGS “gold standard”, we generated 2x2  
205 contingency tables for detected and not detected results of each variant call or target call. To measure the  
206 level of agreement between WGS and the variant panel, we performed agreement analyses with kappa  
207 ( $\kappa$ ) results and 95% confidence intervals (95% CI) using the publicly-available GraphPad Prism web  
208 calculator (<https://graphpad.com/quickcalcs/kappa2/>, last accessed April 20, 2022). Level of agreement  
209 was interpreted from kappa values as previously described (39). Interpretations included no ( $\kappa < 0$ ),  
210 slight ( $0 \leq \kappa \leq 0.20$ ), fair ( $0.21 \leq \kappa \leq 0.40$ ), moderate ( $0.41 \leq \kappa \leq 0.60$ ), substantial ( $0.61 \leq \kappa \leq 0.80$ ), and  
211 almost perfect agreement ( $0.80 \leq \kappa \leq 1.00$ ). In addition, we measured diagnostic sensitivity and  
212 specificity and negative (NPV) and positive predictive values (PPV) for each variant and individual  
213 target polymorphism tested (GraphPad Prism v.9.3.1). Ninety-five percent confidence intervals were  
214 calculated by the hybrid Wilson/Brown method. Fisher’s exact tests were performed for each  
215 contingency table for each variant and/or target tested.

216 Statistical analyses were performed for variant call results of 12 of the possible 16 variants on the  
217 panel. We also performed these analyses for 30 of the 36 possible targets on the panel as clinical  
218 specimens that encoded 6 specific amino acid polymorphisms (D80G, Y453F, E484Q, Q493K, N501T,  
219 I692V) were not recovered for this study. In addition, we did not recover any specimens that harbored  
220 the native D614 amino acid (A23403 nucleotide), and, therefore, we were not able to compute level of  
221 agreement or diagnostic specificity for the D614G variant or D614G target calls. In addition, for  
222 performance analyses of targets H69\_V70del, N439K, and E484K, we excluded specimens that resulted  
223 in target dropout as we could not infer nucleotide polymorphisms that caused dropout given that  
224 primer/probe sequences are proprietary and not known.

225 To assess prevalence of variant panel targets across Omicron sublineages, we interrogated  
226 publicly-available SARS-CoV-2 genomes on the GISAID database (last accessed May 6, 2022). Using  
227 the online graphical user interface, we counted the number of genomes that harbored each of the 36  
228 possible substitutions for each of four Omicron sublineages: BA.2.12.1 (n = 12324 genomes), BA.3 (n =  
229 184), BA.4 (n = 857), BA.5 (n = 437). Prevalence of each substitution was determined by dividing the  
230 number of genomes with the substitution by the total number of genomes analyzed for the sublineage in  
231 question.

232

### 233 *Display Items*

234 All figures are original and were generated using the GraphPad Prism software, Microsoft Excel  
235 v16.60, and finished in Adobe Illustrator (v.26.1). **Fig. 1A** was created in BioRender.com and finished  
236 in Adobe Illustrator.

237

### 238 *Data availability*

239 All single variant consensus genome sequences were deposited in the publicly-available Global  
240 Initiative on Sharing Avian Influenza Data (GISAID) database ([www.gisaid.org](http://www.gisaid.org)) [accession identifiers  
241 indicated in **Table S4**]. The remaining 10 genomes with mixed patterns of mutations were not deposited  
242 into GISAID as single variant consensus genomes could not be resolved (data available upon request).

243 **Results**

244 We analyzed a diverse set of 391 SARS-CoV-2 viral RNA specimens that were collected from  
245 infected patients over 18 months of the COVID-19 pandemic in the NYC metropolitan area and  
246 Colombia. These RNA all underwent WGS that resulted in consensus genomes that comprise 56 distinct  
247 phylogenetic Pango lineages and corresponded to 12 of the 16 possible variant calls on the panel (**Fig.**  
248 **1C**). These included 39 Iota (B.1.526), 40 Alpha (B.1.1.7), 110 Delta (B.1.617.2 (n = 3) + AY.x (n =  
249 107)), and 79 Omicron (B.1.1.529 [BA.1 sublineage]) specimens. We also included 45 specimens that  
250 corresponded to 3 variants that are not defined by the panel (e.g., Lambda (C.37), Mu (B.1.621),  
251 Omicron (BA.2 sublineage)) to interrogate the assay's ability to distinguish these based on target result  
252 patterns.

253

254 *Diagnostic performance of variant calling*

255 To evaluate the diagnostic performance of the Agena MassARRAY<sup>®</sup> Variant Panel, phylogenetic  
256 results of consensus sequences based on WGS data served as the “gold standard” for comparison. Of  
257 391 specimens tested on the variant panel, there were 62 with variant calls that were discordant from  
258 WGS data; however, 45 of these consisted of specimens whose sequenced variant was without an  
259 appropriately defined variant algorithm on the panel. Therefore, only 17 (4.91%) of clinical RNA tested  
260 yielded discordant results between WGS and the expected results on the variant panel.

261 We measured the level of agreement between the overall variant calls from WGS and the variant  
262 panel (**Table 1**). Of the 12 panel variants in our study set, we performed agreement analyses on 11. We  
263 could not measure level of agreement – or diagnostic sensitivity/specificity – for the isolated D614G  
264 result because specimens which concurrently encoded the native D614 amino acid and did not yield any  
265 other variant result were not recovered for this study.

266 Overall, we observed a high level of agreement (e.g.,  $\kappa \geq 0.856$ ) for 9/11 variants including the  
267 contemporary Delta (B.1.617.2+AY.x) and Omicron (BA.1) variants. The Zeta (P.2) and Eta (B.1.525)  
268 variant calls demonstrated the lowest level of agreement. The single Zeta variant confirmed by WGS  
269 that was tested (PV26936) resulted as the Florida variant on the panel (**Table S4**). Interestingly,  
270 although the E484K and the four native amino acids – L18, K417, A701, Q677H – were correctly  
271 detected as part of the Zeta target algorithm, detection of K1191N and Q493K targets met the Florida  
272 variant target result criteria. The low level of agreement for the Zeta variant call is also impacted by the  
273 fact that all 15 Mu (B.1.621) specimens tested on the panel were incorrectly identified as Zeta; however,  
274 it is important to note that the Mu variant is not yet defined on this panel. Of the 7 Eta (B.1.525) variants  
275 tested on the panel, only 1 correctly identified as Eta while the remaining 6 resulted as detected D614G.  
276 These did not meet the minimum number of detectable targets to yield the Eta result and only resulted in  
277 2-3 of the 4 minimum required targets. These results may be the consequences of RNA degradation over  
278 long-term storage. For example, the six discordant specimens encode the H69\_V70del by WGS, but all  
279 yielded dropout of that target on the panel which further supports this scenario.

280 We also measured the diagnostic sensitivity and specificity of the panel (**Fig. 2A-B**) for the  
281 variants tested. Diagnostic sensitivity ranged from 0% (95% CI: 0-94.87%) [Zeta] to 100% (95% CI:  
282 91.24-100%) [Alpha]. Unsurprisingly, the specimens for which we had limited (e.g., <10) specimens  
283 available for testing had the lowest measured sensitivities and broadest CIs including Zeta and Eta  
284 variants. Among variants for which we recovered >10 specimens for testing, diagnostic sensitivity was  
285  $\geq 93.67\%$  [Omicron (BA.1)]. In addition, the variant panel demonstrated a high level of diagnostic  
286 specificity across all 11 variants tested that ranged from 96.15% (95% CI: 93.75-97.66%) for the Zeta  
287 variant to >99% for all other variants (**Fig. 2B**). Furthermore, excluding the Zeta variant, the panel  
288 results showed high PPVs ( $\geq 0.933$ ) and high NPVs ( $\geq 0.984$ ) for all variant calls (**Table S5**).

289 *Diagnostic performance of distinct target calls*

290 To evaluate the diagnostic capabilities of each of the 36 targeted polymorphisms that comprise  
291 the variant panel, we performed interrater agreement analyses and measured the diagnostic sensitivity  
292 and specificity of each assay target. Across all 391 viral RNA specimens, each of 30 of the possible 36  
293 polymorphisms were present in at least one specimen.

294 When we performed agreement analyses on each of these 30 targets (**Table 2**), 25 demonstrated  
295 almost perfect levels of agreement ( $\kappa \geq 0.820$ ). The targets with suboptimal levels of agreement for our  
296 dataset included D215G ( $\kappa = 0$ ; no agreement), L242\_244del ( $\kappa = 0.568$ ; moderate agreement), N501Y  
297 ( $\kappa = 0.528$ ; moderate agreement), and K1191N ( $\kappa = 0.799$ ; substantial agreement). This low level of  
298 agreement may be impacted by small sample sizes tested. Indeed, we only recovered 2-4 specimens that  
299 encoded each of the D215G, L242\_244del, and K1191N targets, Therefore, small frequencies (e.g., 2-4)  
300 of inaccurate calls may explain this result. It is important to note that our study set did not include  
301 specimens with the native D614 amino acid (A24303 nucleotide), and level of agreement could not be  
302 calculated for the D614G target.

303 Interestingly, for N501Y target, we found that of 158 specimens with the polymorphism by  
304 WGS, 79 yielded a false-negative result on the variant panel. All 79 belong to the Omicron (BA.1)  
305 variant lineage, and when reanalyzed excluding these BA.1 specimens, interrater agreement was almost  
306 perfect ( $\kappa = 0.975$ ) (**Table 2**). This suggests genomic variation outside original assay design may impact  
307 primer/probe binding and yield distinct target results for novel variants.

308 Across the 30 targets tested, the average diagnostic sensitivity measured was 90.2% (**Fig. 2C**).  
309 The targets with the lowest sensitivities included D80A (75.00%, 95% CI: 30.06-98.72%), D215G (0%,  
310 95% CI: 0.00-56.00%), L242\_244del (50.00%, 95% CI: 9.00-91.00%), and N501Y (50.00%, 95% CI:

311 42.00-58.00%). Notably, when all BA.1 specimens were excluded from the analyses, the sensitivity of  
312 the N501Y target improved to 100.00% (95% CI: 95.00-100.00%).

313 The variant panel assay demonstrated a high diagnostic specificity across nearly all 30 targets  
314 tested in this study (**Fig. 2D**). On average, the diagnostic specificity was >99.00% across all of the tested  
315 diagnostic targets. Specificity was not calculated for the D614G target because no clinical specimens  
316 with the native D614 amino acid were recovered in this study. In addition, across the 30 targets, the  
317 PPVs and NPVs were 0.900 and 0.959, respectively (**Table S6**).

318

### 319 *Diagnostic target signatures of undefined variants*

320 Given that the variant panel has a uniquely high level of multiplexing, we also interrogated the  
321 capabilities of the assay to reveal unique signatures of variants not defined by the panel software. To do  
322 this, we included 45 clinical specimens that included the older Lambda (C.37) (n = 21) and Mu  
323 (B.1.621) (n = 15) variants as well as the contemporary Omicron BA.2 variants (n = 9) recently captured  
324 in NYC (**Fig. 3A**). Each of the three were called as D614G, Zeta (P.2), and D614G, respectively on the  
325 panel.

326 Based on the current design of the panel, most of the Lambda specimens tested (18/21) only have  
327 detectable D614G polymorphisms among the 36 targets. The remaining 3 additionally yield a T95I  
328 (C21846U) polymorphism; however, this substitution is not found in any of the 3 consensus sequences,  
329 and, therefore, may represent a nonspecific reaction or a minority intra-host variant. Notably, this  
330 polymorphism is rare and found in only 24/10186 (0.23%) Lambda genomes deposited in GISAID (last  
331 accessed May 6, 2022). The current target design does not target common Lambda substitutions  
332 including G75V, T76I, D253N, L452Q, T859N, or deletions (e.g., amino acids 246-252).



333 All 15 Mu specimens were appropriately called as Zeta (P.2) based on the presence of the native  
334 L18, K417, Q677, and A701 amino acids as well as the E484K which meets the threshold for the Zeta  
335 variant call. All Mu specimens display a signature of six detectable targets that is unique among all other  
336 variant patterns on this assay: T95I, Y144del, E484K, N501Y, D614G, and P681H. Interestingly, none  
337 of the specimens' consensus genome sequences encode the Y144del which suggests other sequence  
338 variation may alter primer/probe binding to this target. In fact, 12 of the Mu sequences harbor  
339 substitutions at positions 144-145 (e.g., Y144S, Y145N) which may impact target detection. The five  
340 other amino acid substitutions are encoded in the consensus genomes of all 15 specimens. Of note,  
341 although specimen K42 features an adenosine insertion at genome position 21995, the downstream  
342 nucleotide sequence encodes these amino acid polymorphisms. In addition to these 5 substitutions, there  
343 are 3 Mu specimens which yielded a detectable Q677H target. However, these genomes harbor the  
344 G23593 nucleotide which encodes the native Q677 amino acid and suggests this is a nonspecific result  
345 or detection of a minor intra-host variant.

346 We also found that the 9 Omicron BA.2 specimens generated a distinct target result signature on  
347 the variant panel assay. All 9 resulted in detection of S477N, T478K, N501Y, D614G, and P681H  
348 targets as well as dropout of the N439K target. The five detected targets each were confirmed by the  
349 presence of the amino acid substitutions in WGS data. We cannot delineate the cause of the N439K  
350 target dropout because we do not know primer/probe sequences at the site of the targeted nucleotide  
351 substitution at position 22879. However, one can speculate that sequence variation around this region  
352 may interfere with primer/probe binding. Indeed, all 9 of the BA.2 specimens harbor the T22882G  
353 polymorphism which results in the N440K substitution. Furthermore, the K417N substitution is found in  
354 all BA.2 consensus genomes but is only detected in 7 specimens. This may be the result of different  
355 nucleic acid quantities across specimens and reflect a limit in analytic sensitivity for the target.

356 Together, these are important findings to gauge the capabilities of this assay to highlight unique target  
357 signatures of variants that may be captured by this platform.

358 Finally, to assess the capabilities of the assay to detect other Omicron sublineages (e.g.,  
359 BA.2.12.1, BA.3, BA.4, BA.5), we independently interrogated the prevalence of each variant panel  
360 target substitution among publicly-available genomes (GISAID) (**Fig. 3B**). We found that 94.9-99.7% of  
361 BA.2.12.1 genomes harbor each of the K417N, S477N, T478K, N501Y, D614G, and P681H  
362 substitutions. With the exception of the N439K target dropout in BA.2 genomes tested in this study, the  
363 BA.2.12.1 target signature harbors the same detectable polymorphisms. While 70.7-99.5% of BA.3  
364 genomes also encode the S477N, T478, N501Y, D614G, and P681H, 63.0-66.3% harbor the  
365 H69\_V70del, T95I, and Y144del substitution which help to distinguish this sublineage from BA.2 and  
366 BA.2.12.1. Furthermore, 88.1% of BA.4 and 99.3% of BA.5 genomes encode the L452R substitution  
367 which may help to differentiate these genomes from other Omicron sublineages.

368

369 **Discussion**

370 Monoclonal antibody treatments are effective in limiting severe COVID-19 but emerging  
371 variants of concern often carry mutations that render the virus partially or completely resistant to  
372 antibody neutralization (13, 14, 40–44). Rapid SARS-CoV-2 variant calling is therefore essential for  
373 personalized COVID-19 treatment interventions. With the advent of commercial and lab-developed  
374 variant panels, however, accurate variant requires robust, high-resolution platforms which are limited in  
375 number and have not undergone evaluation prior to implementation. Indeed, a multi-laboratory external  
376 quality assessment in late 2021 revealed gaps in calling of contemporary variants that stemmed from  
377 inadequate selection of diagnostic targets to discern between variants (27). Given this, highly  
378 multiplexed, efficient platforms are invaluable but are limited in number and warrant comprehensive  
379 evaluation before implementation in the molecular microbiology laboratory.

380 Here, we report a comprehensive diagnostic evaluation of one of the highest multiplexed variant  
381 panel assays on the market. Based on a diverse cohort of clinical specimens across two continents and a  
382 wide timeline of the pandemic, we highlight almost perfect levels of interrater agreement between this  
383 assay and the “gold standard” WGS for 9 of 11 variants and 25 of 30 distinct targets tested. The assay  
384 has a high diagnostic specificity across all variants ( $\geq 96.15\%$ ) and all targets ( $\geq 94.34\%$ ) tested.  
385 Furthermore, the panel shows a high diagnostic specificity and sensitivity for contemporary variants in  
386 global circulation (e.g., Delta, Omicron (BA.1)).

387 Our study does present some limitations particularly with respect to limited sampling. While the  
388 panel has defined target signatures for 16 different variants, we were only able to recover clinical  
389 specimens that corresponded to 11 of these variants for testing. Indeed, variants with the lowest level of  
390 agreement and diagnostic performance metrics were those with some of the fewest specimens recovered  
391 and tested (e.g., Zeta ( $n = 1$ ), Beta ( $n = 4$ ), Eta ( $n = 7$ )). We also did not include specimens from the early

392 phase of the pandemic including D614 viruses (45, 46) which limited diagnostic analyses of the D614G  
393 variant and individual target. It is important to note, however, that the D614G polymorphism has  
394 undergone positive selection to eventuate emergent variants (47), and these older viruses have largely  
395 been replaced by the emergent Omicron lineage(s) (6, 48). We also recognize that we did not conduct  
396 this study at the extraction step of clinical specimens given limited availability of remnant upper  
397 respiratory or saliva specimens.

398 A unique benefit of a highly multiplexed molecular assay is its adaptability to the natural  
399 evolution of the pathogen at hand which confers the ability to identify changes in circulating viruses that  
400 manifest as distinct target result signatures. To assess this potential, we included undefined variants to  
401 determine if the discrete assay target result patterns could elucidate a variant's identity without  
402 necessarily providing a defined result as the current software stands. Testing of Mu specimens resulted  
403 in a distinguishable combination of 5 detectable substitutions, but each result was interpreted as a Zeta  
404 (P.2) variant. This scenario highlights the utility of distinct target results to point to new viruses that  
405 rapidly arise the circulating milieu of variants. Moreover, this underscores the importance of adaptable  
406 target result interpretation software to address acute changes detected in patient populations. We also  
407 tested clinical specimens that corresponded with the most current variant in circulation – the Omicron  
408 sublineage BA.2 – which has largely replaced BA.1 globally over January through April 2022  
409 (<https://covariants.org/>, last accessed 4/26/22). From our results, we report a BA.2-specific pattern of  
410 target results on this panel that can be used to readily discriminate the BA.2 from the BA.1 subtype. The  
411 following weeks/months will be key to monitoring to understand the utility of this platform for capturing  
412 other emerging Omicron sublineages (e.g., BA.2.12.1, BA.3, BA.4, BA.5).

413 Accurate identification of currently circulating and emerging SARS-CoV-2 variants is key to  
414 effective pathogen surveillance and providing optimal care to patients. Although WGS is the mainstay

415 for surveillance, it is important to consider in the global context of a pandemic, this may not be a  
416 realistic technology for many LICs and LMCs (29). Therefore, there is a great need for rapid, cost-  
417 effective, conventional technologies (e.g., RT-PCR) in the clinical laboratory. However, these require  
418 increased diagnostic resolution to adequately capture viral evolution and meet the needs of pathogen  
419 surveillance. Thus, highly multiplexed molecular assays such as the one presented benefit from high  
420 discriminatory power and are a vital tool to shed light on changing viral dynamics.

421

422 **References**

- 423 1. Kalia K, Saberwal G, Sharma G. 2021. The lag in SARS-CoV-2 genome submissions to GISAID.  
424 Nat Biotechnol 39:1058–1060.
- 425 2. Litwin T, Timmer J, Berger M, Wahl-Kordon A, Müller MJ, Kreutz C. 2022. Preventing COVID-  
426 19 outbreaks through surveillance testing in healthcare facilities: a modelling study. BMC Infect  
427 Dis 22:105.
- 428 3. Deng X, Gu W, Federman S, du Plessis L, Pybus OG, Faria N, Wang C, Yu G, Bushnell B, Pan C-  
429 Y, Guevara H, Sotomayor-Gonzalez A, Zorn K, Gopez A, Servellita V, Hsu E, Miller S, Bedford  
430 T, Greninger AL, Roychoudhury P, Starita LM, Famulare M, Chu HY, Shendure J, Jerome KR,  
431 Anderson C, Gangavarapu K, Zeller M, Spencer E, Andersen KG, MacCannell D, Paden CR, Li Y,  
432 Zhang J, Tong S, Armstrong G, Morrow S, Willis M, Matyas BT, Mase S, Kasirye O, Park M,  
433 Masinde G, Chan C, Yu AT, Chai SJ, Villarino E, Bonin B, Wadford DA, Chiu CY. 2020.  
434 Genomic surveillance reveals multiple introductions of SARS-CoV-2 into Northern California.  
435 Science <https://doi.org/10.1126/science.abb9263>.
- 436 4. Hernandez MM, Gonzalez-Reiche AS, Alshammary H, Fabre S, Khan Z, van De Guchte A, Obla  
437 A, Ellis E, Sullivan MJ, Tan J, Albuquerque B, Soto J, Wang C-Y, Sridhar SH, Wang Y-C, Smith  
438 M, Sebra R, Paniz-Mondolfi AE, Gitman MR, Nowak MD, Cordon-Cardo C, Luksza M, Krammer  
439 F, van Bakel H, Simon V, Sordillo EM. 2021. Molecular evidence of SARS-CoV-2 in New York  
440 before the first pandemic wave. Nat Commun 12:3463.
- 441 5. Tao K, Tzou PL, Nouhin J, Gupta RK, de Oliveira T, Kosakovsky Pond SL, Fera D, Shafer RW.  
442 2021. The biological and clinical significance of emerging SARS-CoV-2 variants. Nat Rev Genet  
443 22:757–773.

- 444 6. 2021. Classification of Omicron (B.1.1.529): SARS-CoV-2 Variant of Concern. World Health  
445 Organization. [https://www.who.int/news/item/26-11-2021-classification-of-omicron-\(b.1.1.529\)-](https://www.who.int/news/item/26-11-2021-classification-of-omicron-(b.1.1.529)-sars-cov-2-variant-of-concern)  
446 [sars-cov-2-variant-of-concern](https://www.who.int/news/item/26-11-2021-classification-of-omicron-(b.1.1.529)-sars-cov-2-variant-of-concern). Retrieved 3 March 2022.
- 447 7. Dhar MS, Marwal R, Vs R, Ponnusamy K, Jolly B, Bhojar RC, Sardana V, Naushin S, Rophina M,  
448 Mellan TA, Mishra S, Whittaker C, Fatihi S, Datta M, Singh P, Sharma U, Ujjainiya R, Bhatheja N,  
449 Divakar MK, Singh MK, Imran M, Senthivel V, Maurya R, Jha N, Mehta P, A V, Sharma P, Vr A,  
450 Chaudhary U, Soni N, Thukral L, Flaxman S, Bhatt S, Pandey R, Dash D, Faruq M, Lall H, Gogia  
451 H, Madan P, Kulkarni S, Chauhan H, Sengupta S, Kabra S, Indian SARS-CoV-2 Genomics  
452 Consortium (INSACOG)<sup>‡</sup>, Gupta RK, Singh SK, Agrawal A, Rakshit P, Nandicoori V, Tallapaka  
453 KB, Sowpati DT, Thangaraj K, Bashyam MD, Dalal A, Sivasubbu S, Scaria V, Parida A, Raghav  
454 SK, Prasad P, Sarin A, Mayor S, Ramakrishnan U, Palakodeti D, Seshasayee ASN, Bhat M,  
455 Shouche Y, Pillai A, Dikid T, Das S, Maitra A, Chinnaswamy S, Biswas NK, Desai AS,  
456 Pattabiraman C, Manjunatha MV, Mani RS, Arunachal Udipi G, Abraham P, Atul PV, Cherian SS.  
457 2021. Genomic characterization and epidemiology of an emerging SARS-CoV-2 variant in Delhi,  
458 India. *Science* 374:995–999.
- 459 8. Arora P, Zhang L, Rocha C, Sidarovich A, Kempf A, Schulz S, Cossmann A, Manger B, Baier E,  
460 Tampe B, Moerer O, Dickel S, Dopfer-Jablonka A, Jäck H-M, Behrens GMN, Winkler MS,  
461 Pöhlmann S, Hoffmann M. 2022. Comparable neutralisation evasion of SARS-CoV-2 omicron  
462 subvariants BA.1, BA.2, and BA.3. *Lancet Infect Dis* [https://doi.org/10.1016/S1473-](https://doi.org/10.1016/S1473-3099(22)00224-9)  
463 [3099\(22\)00224-9](https://doi.org/10.1016/S1473-3099(22)00224-9).
- 464 9. Plante JA, Liu Y, Liu J, Xia H, Johnson BA, Lokugamage KG, Zhang X, Muruato AE, Zou J,  
465 Fontes-Garfias CR, Mirchandani D, Scharton D, Bilello JP, Ku Z, An Z, Kalveram B, Freiberg AN,

- 466 Menachery VD, Xie X, Plante KS, Weaver SC, Shi P-Y. 2021. Spike mutation D614G alters  
467 SARS-CoV-2 fitness. *Nature* 592:116–121.
- 468 10. Tang P, Hasan MR, Chemaitelly H, Yassine HM, Benslimane FM, Al Khatib HA, AlMukdad S,  
469 Coyle P, Ayoub HH, Al Kanaani Z, Al Kuwari E, Jeremijenko A, Kaleeckal AH, Latif AN, Shaik  
470 RM, Abdul Rahim HF, Nasrallah GK, Al Kuwari MG, Al Romaihi HE, Butt AA, Al-Thani MH, Al  
471 Khal A, Bertollini R, Abu-Raddad LJ. 2021. BNT162b2 and mRNA-1273 COVID-19 vaccine  
472 effectiveness against the SARS-CoV-2 Delta variant in Qatar. *Nat Med*  
473 <https://doi.org/10.1038/s41591-021-01583-4>.
- 474 11. Malden DE, Bruxvoort KJ, Tseng HF, Ackerson B, Choi SK, Florea A, Tubert J, Takhar H,  
475 Aragonés M, Hong V, Talarico CA, McLaughlin JM, Qian L, Tartof SY. 2021. Distribution of  
476 SARS-CoV-2 Variants in a Large Integrated Health Care System - California, March-July 2021.  
477 *MMWR Morb Mortal Wkly Rep* 70:1415–1419.
- 478 12. Nyberg T, Ferguson NM, Nash SG, Webster HH, Flaxman S, Andrews N, Hinsley W, Bernal JL,  
479 Kall M, Bhatt S, Blomquist P, Zaidi A, Volz E, Aziz NA, Harman K, Funk S, Abbott S, COVID-19  
480 Genomics UK (COG-UK) consortium, Hope R, Charlett A, Chand M, Ghani AC, Seaman SR,  
481 Dabrera G, De Angelis D, Presanis AM, Thelwall S. 2022. Comparative analysis of the risks of  
482 hospitalisation and death associated with SARS-CoV-2 omicron (B.1.1.529) and delta (B.1.617.2)  
483 variants in England: a cohort study. *Lancet* 399:1303–1312.
- 484 13. Bruel T, Hadjadj J, Maes P, Planas D, Seve A, Staropoli I, Guivel-Benhassine F, Porrot F, Bolland  
485 W-H, Nguyen Y, Casadevall M, Charre C, Péré H, Veyer D, Prot M, Baidaliuk A, Cuypers L,  
486 Planchais C, Mouquet H, Baele G, Mouthon L, Hocqueloux L, Simon-Loriere E, André E, Terrier  
487 B, Prazuck T, Schwartz O. 2022. Serum neutralization of SARS-CoV-2 Omicron sublineages BA.1



- 488 and BA.2 in patients receiving monoclonal antibodies. Nat Med [https://doi.org/10.1038/s41591-](https://doi.org/10.1038/s41591-022-01792-5)  
489 022-01792-5.
- 490 14. Tada T, Zhou H, Dcosta BM, Samanovic MI, Chivukula V, Herati RS, Hubbard SR, Mulligan MJ,  
491 Landau NR. 2022. Increased resistance of SARS-CoV-2 Omicron variant to neutralization by  
492 vaccine-elicited and therapeutic antibodies. *eBioMedicine* 78.
- 493 15. Hernandez MM, Banu R, Gonzalez-Reiche AS, Gray B, Shrestha P, Cao L, Chen F, Shi H, Hanna  
494 A, Ramírez JD, van de Guchte A, Sebra R, Gitman MR, Nowak MD, Cordon-Cardo C, Schutzbank  
495 TE, Simon V, van Bakel H, Sordillo EM, Paniz-Mondolfi AE, Mount Sinai PSP Study Group.  
496 2021. RT-PCR/MALDI-TOF diagnostic target performance reflects circulating SARS-CoV-2  
497 variant diversity in New York City. *bioRxiv*.
- 498 16. Bal A, Destras G, Gaymard A, Stefic K, Marlet J, Eymieux S, Regue H, Semanas Q, d'Aubarede C,  
499 Billaud G, Laurent F, Gonzalez C, Mekki Y, Valette M, Bouscambert M, Gaudy-Graffin C, Lina B,  
500 Morfin F, Josset L, COVID-Diagnosis HCL Study Group. 2021. Two-step strategy for the  
501 identification of SARS-CoV-2 variant of concern 202012/01 and other variants with spike deletion  
502 H69-V70, France, August to December 2020. *Euro Surveill* 26.
- 503 17. Sánchez-Calvo JM, Alados Arboledas JC, Ros Vidal L, de Francisco JL, López Prieto MD. 2021.  
504 Diagnostic pre-screening method based on N-gene dropout or delay to increase feasibility of  
505 SARS-CoV-2 VOC B.1.1.7 detection. *Diagn Microbiol Infect Dis* 101:115491.
- 506 18. Erster O, Mendelson E, Levy V, Kabat A, Mannasse B, Asraf H, Azar R, Ali Y, Shirazi R, Bucris  
507 E, Bar-Ilan D, Mor O, Mandelboim M, Sofer D, Fleishon S, Zuckerman NS. 2021. Rapid and High-

- 508 Throughput Reverse Transcriptase Quantitative PCR (RT-qPCR) Assay for Identification and  
509 Differentiation between SARS-CoV-2 Variants B.1.1.7 and B.1.351. *Microbiol Spectr* 9:e0050621.
- 510 19. Teng I-T, Nazzari AF, Choe M, Liu T, de Souza MO, Petrova Y, Tsybovsky Y, Wang S, Zhang B,  
511 Artamonov M, Madan B, Huang A, Lopez Acevedo SN, Pan X, Ruckwardt TJ, DeKosky BJ,  
512 Mascola JR, Misasi J, Sullivan NJ, Zhou T, Kwong PD. 2021. Molecular probes of spike  
513 ectodomain and its subdomains for SARS-CoV-2 variants, Alpha through Omicron. *bioRxiv*.
- 514 20. Ashford F, Best A, Dunn SJ, Ahmed Z, Siddiqui H, Melville J, Wilkinson S, Mirza J, Cumley N,  
515 Stockton J, Ferguson J, Wheatley L, Ratcliffe E, Casey A, Plant T, COVID-19 Genomics UK  
516 (COG-UK) Consortium, Quick J, Richter A, Loman N, McNally A. 2022. SARS-CoV-2 Testing in  
517 the Community: Testing Positive Samples with the TaqMan SARS-CoV-2 Mutation Panel To Find  
518 Variants in Real Time. *J Clin Microbiol* 60:e0240821.
- 519 21. Nörz D, Grunwald M, Tang HT, Weinschenk C, Günther T, Robitaille A, Giersch K, Fischer N,  
520 Grundhoff A, Aepfelbacher M, Pfefferle S, Lütgehetmann M. 2022. Clinical Evaluation of a Fully-  
521 Automated High-Throughput Multiplex Screening-Assay to Detect and Differentiate the SARS-  
522 CoV-2 B.1.1.529 (Omicron) and B.1.617.2 (Delta) Lineage Variants. *Viruses* 14.
- 523 22. Yeung Priscilla S.-W., Wang Hannah, Sibai Mamdouh, Solis Daniel, Yamamoto Fumiko, Iwai  
524 Naomi, Jiang Becky, Hammond Nathan, Truong Bernadette, Bihon Selamawit, Santos Suzette, Mar  
525 Marilyn, Mai Claire, Mfuh Kenji O., Miller Jacob A., Huang ChunHong, Sahoo Malaya K.,  
526 Zehnder James L., Pinsky Benjamin A., Caliendo Angela M. 2022. Evaluation of a Rapid and  
527 Accessible Reverse Transcription-Quantitative PCR Approach for SARS-CoV-2 Variant of  
528 Concern Identification. *J Clin Microbiol* 0:e00178-22.

- 529 23. Hale R, Crowley P, Dervisevic S, Coupland L, Cliff PR, Ebie S, Snell LB, Paul J, Williams C,  
530 Randell P, Pond M, Stanley K. 2021. Development of a Multiplex Tandem PCR (MT-PCR) Assay  
531 for the Detection of Emerging SARS-CoV-2 Variants. *Viruses* 13.
- 532 24. De Pace V, Bruzzone B, Orsi A, Ricucci V, Domnich A, Guarona G, Randazzo N, Stefanelli F,  
533 Battolla E, Dusi PA, Lillo F, Icardi G. 2022. Comparative Analysis of Five Multiplex RT-PCR  
534 Assays in the Screening of SARS-CoV-2 Variants. *Microorganisms* 10.
- 535 25. Nussbaum EZ, Thiriveedhi V, Uddin R, Cho HE, Carroll S, Rosenberg ES, Lemieux JE, Turbett  
536 SE. 2022. Implementation of a SARS-CoV-2 Genotyping Panel for Prompt Omicron Variant  
537 Identification: A Pragmatic Tool for Clinical Laboratories. *Ann Intern Med*  
538 <https://doi.org/10.7326/M22-0023>.
- 539 26. Vogels CBF, Breban MI, Ott IM, Alpert T, Petrone ME, Watkins AE, Kalinich CC, Earnest R,  
540 Rothman JE, Goes de Jesus J, Morales Claro I, Magalhães Ferreira G, Crispim MAE, Brazil-UK  
541 CADDE Genomic Network, Singh L, Tegally H, Anyaneji UJ, Network for Genomic Surveillance  
542 in South Africa, Hodcroft EB, Mason CE, Khullar G, Metti J, Dudley JT, MacKay MJ, Nash M,  
543 Wang J, Liu C, Hui P, Murphy S, Neal C, Laszlo E, Landry ML, Muyombwe A, Downing R,  
544 Razeq J, de Oliveira T, Faria NR, Sabino EC, Neher RA, Fauver JR, Grubaugh ND. 2021.  
545 Multiplex qPCR discriminates variants of concern to enhance global surveillance of SARS-CoV-2.  
546 *PLoS Biol* 19:e3001236.
- 547 27. Buchta C, Camp JV, Jovanovic J, Radler U, Benka B, Puchhammer-Stöckl E, Müller MM,  
548 Griesmacher A, Aberle SW, Görzer I. 2021. Inadequate design of mutation detection panels  
549 prevents interpretation of variants of concern: results of an external quality assessment for SARS-  
550 CoV-2 variant detection. *Clin Chem Lab Med* <https://doi.org/10.1515/cclm-2021-0889>.

- 551 28. Dikdan RJ, Marras SAE, Field AP, Brownlee A, Cironi A, Hill DA, Tyagi S. 2022. Multiplex PCR  
552 Assays for Identifying all Major Severe Acute Respiratory Syndrome Coronavirus 2 Variants. *J*  
553 *Mol Diagn* 24:309–319.
- 554 29. Brito AF, Semenova E, Dudas G, Hassler GW, Kalinich CC, Kraemer MUG, Ho J, Tegally H,  
555 Githinji G, Agoti CN, Matkin LE, Whittaker C, Danish Covid-19 Genome Consortium, COVID-19  
556 Impact Project, Network for Genomic Surveillance in South Africa (NGS-SA), GISAID core  
557 curation team, Howden BP, Sintchenko V, Zuckerman NS, Mor O, Blankenship HM, de Oliveira  
558 T, Lin RTP, Siqueira MM, Resende PC, Vasconcelos ATR, Spilki FR, Aguiar RS, Alexiev I,  
559 Ivanov IN, Philipova I, Carrington CVF, Sahadeo NSD, Gurry C, Maurer-Stroh S, Naidoo D, von  
560 Eije KJ, Perkins MD, van Kerkhove M, Hill SC, Sabino EC, Pybus OG, Dye C, Bhatt S, Flaxman  
561 S, Suchard MA, Grubaugh ND, Baele G, Faria NR. 2021. Global disparities in SARS-CoV-2  
562 genomic surveillance. *medRxiv* <https://doi.org/10.1101/2021.08.21.21262393>.
- 563 30. Xuan J, Yu Y, Qing T, Guo L, Shi L. 2013. Next-generation sequencing in the clinic: promises and  
564 challenges. *Cancer Lett* 340:284–295.
- 565 31. Lai E, Becker D, Brzoska P, Cassens T, Davis-Turak J, Diamond E, Furtado M, Gandhi M, Gort D,  
566 Greninger AL, Hajian P, Hayashibara K, Kennedy EB, Laurent M, Lee W, Leonetti NA, Lozach J,  
567 Lu J, Nguyen JM, O'Donovan KMC, Peck T, Radcliffe GE, Ramirez JM, Roychoudhury P,  
568 Sandoval E, Walsh B, Weinell M, Wesselman C, Wesselman T, White S, Williams S, Wong D, Yu  
569 Y, Creager RS. 2022. A method for variant agnostic detection of SARS-CoV-2, rapid monitoring of  
570 circulating variants, detection of mutations of biological significance, and early detection of  
571 emergent variants such as Omicron. *bioRxiv*.

- 572 32. Welch NL, Zhu M, Hua C, Weller J, Mirhashemi ME, Nguyen TG, Mantena S, Bauer MR, Shaw  
573 BM, Ackerman CM, Thakku SG, Tse MW, Kehe J, Uwera M-M, Eversley JS, Bielwaski DA,  
574 McGrath G, Braidt J, Johnson J, Cerrato F, Moreno GK, Krasilnikova LA, Petros BA, Gionet GL,  
575 King E, Huard RC, Jalbert SK, Cleary ML, Fitzgerald NA, Gabriel SB, Gallagher GR, Smole SC,  
576 Madoff LC, Brown CM, Keller MW, Wilson MM, Kirby MK, Barnes JR, Park DJ, Siddle KJ,  
577 Happi CT, Hung DT, Springer M, MacInnis BL, Lemieux JE, Rosenberg E, Branda JA, Blainey  
578 PC, Sabeti PC, Myhrvold C. 2022. Multiplexed CRISPR-based microfluidic platform for clinical  
579 testing of respiratory viruses and identification of SARS-CoV-2 variants. *Nat Med*  
580 <https://doi.org/10.1038/s41591-022-01734-1>.
- 581 33. Hernandez MM, Banu R, Shrestha P, Patel A, Chen F, Cao L, Fabre S, Tan J, Lopez H, Chiu N,  
582 Shifrin B, Zapolskaya I, Flores V, Lee PY, Castañeda S, Ramírez JD, Jhang J, Osorio G, Gitman  
583 MR, Nowak MD, Reich DL, Cordon-Cardo C, Sordillo EM, Paniz-Mondolfi AE. 2021. RT-  
584 PCR/MALDI-TOF mass spectrometry-based detection of SARS-CoV-2 in saliva specimens. *J Med*  
585 *Virol* <https://doi.org/10.1002/jmv.27069>.
- 586 34. Hernandez MM, Banu R, Gonzalez-Reiche AS, van de Guchte A, Khan Z, Shrestha P, Cao L, Chen  
587 F, Shi H, Hanna A, Alshammary H, Fabre S, Amoako A, Obla A, Albuquerque B, Patiño LH,  
588 Ramírez JD, Sebra R, Gitman MR, Nowak MD, Cordon-Cardo C, Schutzbank TE, Simon V, van  
589 Bakel H, Sordillo EM, Paniz-Mondolfi AE. 2022. Robust clinical detection of SARS-CoV-2  
590 variants by RT-PCR/MALDI-TOF multitarget approach. *J Med Virol* 94:1606–1616.
- 591 35. Patiño LH, Castañeda S, Muñoz M, Ballesteros N, Ramirez AL, Luna N, Guerrero-Araya E, Pérez  
592 J, Correa-Cárdenas CA, Duque MC, Méndez C, Oliveros C, Shaban MV, Paniz-Mondolfi AE,

- 593        Ramírez JD. 2022. Epidemiological Dynamics of SARS-CoV-2 Variants During Social Protests in  
594        Cali, Colombia. *Front Med* 9:863911.
- 595    36. Rambaut A, Holmes EC, O’Toole Á, Hill V, McCrone JT, Ruis C, du Plessis L, Pybus OG. 2020.  
596        A dynamic nomenclature proposal for SARS-CoV-2 lineages to assist genomic epidemiology. *Nat*  
597        *Microbiol* 5:1403–1407.
- 598    37. Gonzalez-Reiche AS, Hernandez MM, Sullivan MJ, Ciferri B, Alshammary H, Obla A, Fabre S,  
599        Kleiner G, Polanco J, Khan Z, Albuquerque B, van de Guchte A, Dutta J, Francoeur N, Melo BS,  
600        Oussenko I, Deikus G, Soto J, Sridhar SH, Wang Y-C, Twyman K, Kasarskis A, Altman DR,  
601        Smith M, Sebra R, Aberg J, Krammer F, García-Sastre A, Luksza M, Patel G, Paniz-Mondolfi A,  
602        Gitman M, Sordillo EM, Simon V, van Bakel H. 2020. Introductions and early spread of SARS-  
603        CoV-2 in the New York City area. *Science* 369:297–301.
- 604    38. Ramírez JD, Muñoz M, Ballesteros N, Patiño LH, Castañeda S, Rincón CA, Mendez C, Oliveros C,  
605        Perez J, Márquez EK, Ortiz F de LS, Correa-Cárdenas CA, Duque MC, Paniz-Mondolfi A. 2021.  
606        Phylogenomic Evidence of Reinfection and Persistence of SARS-CoV-2: First Report from  
607        Colombia. *Vaccines (Basel)* 9.
- 608    39. Landis JR, Koch GG. 1977. The measurement of observer agreement for categorical data.  
609        *Biometrics* 33:159–174.
- 610    40. Planas D, Veyer D, Baidaliuk A, Staropoli I, Guivel-Benhassine F, Rajah MM, Planchais C, Porrot  
611        F, Robillard N, Puech J, Prot M, Gallais F, Gantner P, Velay A, Le Guen J, Kassis-Chikhani N,  
612        Edriss D, Belec L, Seve A, Courtellemont L, Péré H, Hocqueloux L, Fafi-Kremer S, Prazuck T,

- 613 Mouquet H, Bruel T, Simon-Lorière E, Rey FA, Schwartz O. 2021. Reduced sensitivity of SARS-  
614 CoV-2 variant Delta to antibody neutralization. *Nature* 596:276–280.
- 615 41. Liu C, Ginn HM, Dejnirattisai W, Supasa P, Wang B, Tuekprakhon A, Nutalai R, Zhou D, Mentzer  
616 AJ, Zhao Y, Duyvesteyn HME, López-Camacho C, Slon-Campos J, Walter TS, Skelly D, Johnson  
617 SA, Ritter TG, Mason C, Costa Clemens SA, Gomes Naveca F, Nascimento V, Nascimento F,  
618 Fernandes da Costa C, Resende PC, Pauvolid-Correa A, Siqueira MM, Dold C, Temperton N,  
619 Dong T, Pollard AJ, Knight JC, Crook D, Lambe T, Clutterbuck E, Bibi S, Flaxman A, Bittaye M,  
620 Belij-Rammerstorfer S, Gilbert SC, Malik T, Carroll MW, Klenerman P, Barnes E, Dunachie SJ,  
621 Baillie V, Serafin N, Ditse Z, Da Silva K, Paterson NG, Williams MA, Hall DR, Madhi S, Nunes  
622 MC, Goulder P, Fry EE, Mongkolsapaya J, Ren J, Stuart DI, Screaton GR. 2021. Reduced  
623 neutralization of SARS-CoV-2 B.1.617 by vaccine and convalescent serum. *Cell* 184:4220-  
624 4236.e13.
- 625 42. Lusvarghi S, Pollett SD, Neerukonda SN, Wang W, Wang R, Vassell R, Epsi NJ, Fries AC, Agan  
626 BK, Lindholm DA, Colombo CJ, Mody R, Ewers EC, Lalani T, Ganesan A, Goguet E, Hollis-Perry  
627 M, Coggins SA, Simons MP, Katzelnick LC, Wang G, Tribble DR, Bentley L, Eakin AE, Broder  
628 CC, Erlandson KJ, Laing ED, Burgess TH, Mitre E, Weiss CD. 2022. SARS-CoV-2 BA.1 variant  
629 is neutralized by vaccine booster-elicited serum, but evades most convalescent serum and  
630 therapeutic antibodies. *Sci Transl Med* eabn8543.
- 631 43. Yu J, Collier A-RY, Rowe M, Mardas F, Ventura JD, Wan H, Miller J, Powers O, Chung B,  
632 Siamatu M, Hachmann NP, Surve N, Nampanya F, Chandrashekar A, Barouch DH. 2022.  
633 Neutralization of the SARS-CoV-2 Omicron BA.1 and BA.2 Variants. *N Engl J Med* 386:1579–  
634 1580.

- 635 44. Guo D, Duan H, Cheng Y, Wang Y, Hu J, Shi H. 2022. Omicron-included mutation-induced  
636 changes in epitopes of SARS-CoV-2 spike protein and effectiveness assessments of current  
637 antibodies. *Molecular Biomedicine* 3:12.
- 638 45. Korber B, Fischer WM, Gnanakaran S, Yoon H, Theiler J, Abfalterer W, Hengartner N, Giorgi EE,  
639 Bhattacharya T, Foley B, Hastie KM, Parker MD, Partridge DG, Evans CM, Freeman TM, de Silva  
640 TI, Sheffield COVID-19 Genomics Group, McDanal C, Perez LG, Tang H, Moon-Walker A,  
641 Whelan SP, LaBranche CC, Saphire EO, Montefiori DC. 2020. Tracking Changes in SARS-CoV-2  
642 Spike: Evidence that D614G Increases Infectivity of the COVID-19 Virus. *Cell* 182:812-827.e19.
- 643 46. Isabel S, Graña-Miraglia L, Gutierrez JM, Bundalovic-Torma C, Groves HE, Isabel MR, Eshaghi  
644 A, Patel SN, Gubbay JB, Poutanen T, Guttman DS, Poutanen SM. 2020. Evolutionary and  
645 structural analyses of SARS-CoV-2 D614G spike protein mutation now documented worldwide.  
646 *Sci Rep* 10:14031.
- 647 47. Chakraborty C, Saha A, Sharma AR, Bhattacharya M, Lee S-S, Agoramoorthy G. 2021. D614G  
648 mutation eventuates in all VOI and VOC in SARS-CoV-2: Is it part of the positive selection  
649 pioneered by Darwin? *Mol Ther Nucleic Acids* 26:237–241.
- 650 48. Mallapaty S. 2022. Where did Omicron come from? Three key theories. Nature Publishing Group  
651 UK. <https://doi.org/10.1038/d41586-022-00215-2>. Retrieved 25 April 2022.

652



653 **Acknowledgments**

654 We thank the members of MSHS MML, Simon, and van Bakel laboratories. We are grateful for  
655 the continuous expert guidance provided by the ISMMS Program for the Protection of Human Subjects  
656 (PPHS).

657 We are thankful for the efforts of the Mount Sinai PSP Study Group members (in alphabetical  
658 order): Hala Alshammary, Angela A. Amoako, Mahmoud H. Awawda, Christian Cognigni, Aria  
659 Rooker, Jose Polanco, Levy A. Sominsky, Komal Srivastava, Paras Shrestha, Steve Shi, Jian Zhang,  
660 Zain Khalil.

661

662 **Funding**

663 This research was supported by the Center for Research on Influenza Pathogenesis, a National  
664 Institutes of Health (NIH) funded Center of Excellence for Influenza Research and Surveillance (CEIRS,  
665 contract number HHSN272201400008C; CEIRR contract number 75N93021C00014) [Icahn School of  
666 Medicine at Mount Sinai (ISMMS)], the NIH Office of Research Infrastructure under award numbers  
667 S10OD018522 and S10OD026880 [ISMMS Scientific Computing and Data, Patricia Kovatch],  
668 institutional and philanthropic funds (Open Philanthropy Project, #2020-215611 [ISMMS Department of  
669 Microbiology, Dr. Adolfo Garcia-Sastre, V.S. and H.v.B.], the Pershing Square Foundation [Mount  
670 Sinai Health System, Dr. David L. Reich and A.E.PM.], as well as a Robin Chemers Neustein  
671 Postdoctoral Fellowship Award [A.S.GR.]. We thank the Universidad del Rosario in the framework of  
672 its strategic plan RUTA2025. Thanks to President and the University Council for leading the strategic  
673 projects (JR).

674

675 **Author contributions**

676 M.M.H., R.B., P.S., M.S.PSP.S.G., A.E.PM., M.R.G., M.D.N., M.M., N.L., A.R., S.C., N.B.,  
677 J.D.R. and E.M.S. provided clinical samples for the study. M.M.H., R.B., P.S., M.S.PSP.S.G., and  
678 A.E.PM. accessioned clinical samples. A.S.GR., A.v.d.G, K.F., M.S.PSP.S.G., M.M., N.L., A.R.,  
679 S.A.C., N.B., L.H.P., and H.v.B. performed viral genome sequencing experiments. R.S. provided NGS  
680 services. A.S.GR. and M.S.PSP.S.G. performed genome assembly and data curation. M.M.H., R.B.,  
681 P.S., J.D.R., M.R.G., M.D.N., C.C.C., V.S., H.v.B., E.M.S., and A.E.PM analyzed, interpreted, or  
682 discussed data. M.M.H. wrote the manuscript. M.M.H., J.D.R., and A.E.PM. conceived the study.  
683 E.M.S. and A.E.PM. supervised the study. H.v.B., V.S., A.E.PM., and E.M.S. raised financial support.

684 M.M.H. and A.E.PM are the guarantors of this work and, as such, had full access to all of the  
685 data in the study and take responsibility for the integrity of the data and the accuracy of the data  
686 analysis.

687 **Competing Interests**

688           Robert Sebra is VP of Technology Development and a stockholder at Sema4, a Mount Sinai  
689 Venture. This work, however, was conducted solely at Icahn School of Medicine at Mount Sinai.  
690 Otherwise, the authors declare no competing interests.

691

692 **Table and Figure Legends**

693 **TABLE 1. Diagnostic agreement between WGS and panel variant calls**

694

| Variant            | Number of Specimens <sup>a</sup> | Agreement (%) | Kappa (95% CI)        | Interpretation <sup>b</sup> |
|--------------------|----------------------------------|---------------|-----------------------|-----------------------------|
| Omicron (BA.1)     | 79                               | 98.72 %       | 0.959 (0.924-0.995)   | Almost perfect              |
| Delta              | 110                              | 98.72 %       | 0.968 (0.940-0.996)   | Almost perfect              |
| Alpha              | 40                               | 100.00 %      | 1.000 (1.000-1.000)   | Almost perfect              |
| Beta               | 4                                | 99.74 %       | 0.856 (0.577-1.000)   | Almost perfect              |
| Gamma              | 14                               | 99.74 %       | 0.964 (0.894-1.000)   | Almost perfect              |
| Zeta               | 1                                | 95.91 %       | -0.005 (-0.014-0.004) | None                        |
| Eta                | 7                                | 98.47 %       | 0.247 (0.147-0.640)   | Fair                        |
| Iota               | 39                               | 99.74 %       | 0.986 (0.957-1.000)   | Almost perfect              |
| Epsilon            | 19                               | 100.00 %      | 1.000 (1.000-1.000)   | Almost perfect              |
| B.1.258            | 1                                | 100.00 %      | 1.000 (1.000-1.000)   | Almost perfect              |
| D614G <sup>c</sup> | 27                               | NA            | NA                    | NA                          |
| Broad USA          | 5                                | 100.00 %      | 1.000 (1.000-1.000)   | Almost perfect              |

695

696 <sup>a</sup> Number of specimens confirmed by WGS as the indicated variant.

697 <sup>b</sup> Interpretation of level of agreement is based on reference (39).

698 <sup>c</sup> Agreement analyses were not performed as specimens that harbor the native D614 amino acid were not recovered for  
699 testing. NA, not available.

700

701

702

703 **TABLE 2. Diagnostic agreement between WGS and panel target calls**  
704

| Target               | Number of Specimens <sup>a, b</sup> | Agreement (%) | Kappa (95% CI)      | Interpretation <sup>c</sup> |
|----------------------|-------------------------------------|---------------|---------------------|-----------------------------|
| L5F                  | 42                                  | 99.49 %       | 0.973 (0.935-1.000) | Almost perfect              |
| S13I                 | 19                                  | 99.74 %       | 0.972 (0.916-1.000) | Almost perfect              |
| L18F                 | 15                                  | 98.99 %       | 0.877 (0.758-0.996) | Almost perfect              |
| T19R                 | 110                                 | 98.72 %       | 0.968 (0.940-0.996) | Almost perfect              |
| H69_V70del           | 51                                  | 97.35 %       | 0.906 (0.841-0.970) | Almost perfect              |
| D80A                 | 4                                   | 99.74 %       | 0.856 (0.577-1.000) | Almost perfect              |
| D80G                 | 0                                   | NA            | NA                  | NA                          |
| T95I                 | 159                                 | 96.42 %       | 0.927 (0.889-0.964) | Almost perfect              |
| Y144del              | 126                                 | 92.33 %       | 0.824 (0.764-0.885) | Almost perfect              |
| W152C                | 19                                  | 100.00 %      | 1.000 (1.000-1.000) | Almost perfect              |
| D215G                | 3                                   | 99.23 %       | 0                   | None                        |
| L242_244del          | 4                                   | 99.23 %       | 0.568 (0.127-1.000) | Moderate                    |
| D253G                | 39                                  | 98.98 %       | 0.944 (0.890-0.999) | Almost perfect              |
| K417N                | 92                                  | 97.95 %       | 0.942 (0.902-0.982) | Almost perfect              |
| K417T                | 14                                  | 99.23 %       | 0.899 (0.786-1.000) | Almost perfect              |
| N439K                | 1                                   | 100.00 %      | 1.000 (1.000-1.000) | Almost perfect              |
| L452R                | 124                                 | 98.47 %       | 0.965 (0.937-0.933) | Almost perfect              |
| Y453F                | 0                                   | NA            | NA                  | NA                          |
| S477N                | 90                                  | 100.00 %      | 1.000 (1.000-1.000) | Almost perfect              |
| T478K                | 194                                 | 98.72 %       | 0.974 (0.952-0.997) | Almost perfect              |
| E484Q                | 0                                   | NA            | NA                  | NA                          |
| E484K                | 65                                  | 95.79 %       | 0.860 (0.791-0.929) | Almost perfect              |
| Q493K                | 0                                   | NA            | NA                  | NA                          |
| N501Y                | 158                                 | 79.03 %       | 0.528 (0.447-0.609) | Moderate                    |
| N501Y (exclude BA.1) | 79                                  | 99.04 %       | 0.975 (0.947-1.000) | Almost perfect              |
| N501T                | 0                                   | NA            | NA                  | NA                          |
| A570D                | 40                                  | 100.00 %      | 1.000 (1.000-1.000) | Almost perfect              |
| D614G <sup>d</sup>   | 388                                 | 99.49 %       | NA                  | NA                          |
| Q677H                | 7                                   | 99.23 %       | 0.820 (0.620-1.000) | Almost perfect              |
| Q677P                | 5                                   | 100.00 %      | 1.000 (1.000-1.000) | Almost perfect              |

|        |     |          |                     |                |
|--------|-----|----------|---------------------|----------------|
| P681H  | 141 | 98.47 %  | 0.967 (0.940-0.993) | Almost perfect |
| P681R  | 110 | 98.47 %  | 0.961 (0.931-0.992) | Almost perfect |
| I692V  | 0   | NA       | NA                  | NA             |
| A701V  | 49  | 98.88 %  | 0.955 (0.911-0.999) | Almost perfect |
| T716I  | 40  | 100.00 % | 1.000 (1.000-1.000) | Almost perfect |
| S982A  | 40  | 99.74 %  | 0.986 (0.958-1.000) | Almost perfect |
| K1191N | 2   | 99.74 %  | 0.799 (0.413-1.000) | Substantial    |

---

705

706

707

708

709

710

711

712

<sup>a</sup> Number of specimens that harbor the given target polymorphism by WGS.

<sup>b</sup> Analyses were not performed if specimens with the given target polymorphism by WGS were not recovered for testing. NA, not available.

<sup>c</sup> Interpretation of level of agreement is based on reference (39).

<sup>d</sup> Kappa could not be determined as specimens that harbor the native D614 amino acid were not recovered for testing.

713 **FIG 1. Detection of viral variants by the Agena MassARRAY<sup>®</sup> SARS-CoV-2 Variant Panel.** (A)  
714 SARS-CoV-2 genome with nucleotide positions from 5'-to-3' direction depicted above. *S* gene  
715 polymorphisms targeted by the variant panel (lollipop) and corresponding amino acids are depicted  
716 below. (B) A color map depicts algorithms of target combinations that define 16 distinct SARS-CoV-2  
717 variants on the panel. Variant results are depicted (left) which include the WHO designation (e.g.,  
718 Omicron, Delta, etc.) and corresponding PANGO lineage assignments. Note that the B.1.526.1 variant  
719 was re-designated as B.1.637 to distinguish it from the Iota variant lineage (<https://cov->  
720 [lineages.org/lineage\\_list.html](https://cov-lineages.org/lineage_list.html), last accessed 4/26/22). The minimum number of targets required to  
721 support the corresponding variant result are indicated (right). Target results are depicted as colored cells  
722 indicating detectable native (e.g., unchanged from Wuhan-Hu-1 reference) amino acids which do not  
723 contribute to the variant target algorithm (grey), detectable native amino acids which do contribute to the  
724 algorithm (yellow), detectable amino acid polymorphisms (red), and dropout of the given target  
725 polymorphism. (C) Phylogenetic composition of 391 clinical specimen viral RNA recovered for  
726 diagnostic evaluation of the variant panel. Numbers of each lineage tested are depicted in brackets.  
727

728 **FIG 2. Diagnostic sensitivity and specificity of the Agena MassARRAY<sup>®</sup> SARS-CoV-2 Variant**  
729 **Panel.** (A) Diagnostic sensitivity and (B) diagnostic specificity of eleven variant calls on the panel are  
730 depicted. The number of specimens that correspond with each variant according to WGS are annotated  
731 in brackets. Depiction of (C) diagnostic sensitivity and (D) diagnostic specificity of each of thirty  
732 distinct panel targets. The number of specimens that correspond with each amino acid polymorphism  
733 according to WGS are annotated in brackets for each target. Asterisks (\*) indicate targets for which  
734 dropout results were excluded from analyses (see Methods). For target N501Y, a separate diagnostic  
735 analysis was conducted excluding BA.1 specimens (“N501Y\_Excl-BA.1”). Error bars reflect 95% CI in  
736 all four panels. ND, not determined.  
737



738 **FIG 3. Target result patterns of undefined variants on the Agena MassARRAY<sup>®</sup> SARS-CoV-2**  
739 **Variant Panel. (A)** A color map depicts the observed target results for three undefined SARS-CoV-2  
740 variants tested on the panel: Lambda (C.37), Mu (B.1.621), and Omicron (BA.2). Distinct target patterns  
741 observed among each of the variant types are depicted. Cells indicate the distinct target results including  
742 detectable native amino acid (grey), detection of target polymorphism (red), and target dropout (green).  
743 The number of specimens that yielded each of the distinct target result patterns are indicated on the right  
744 as well as the output variant ID result generated by the variant panel software. (B) A heatmap depicts the  
745 measured prevalence of each variant panel target substitution among publicly-available Omicron  
746 sublineage genomes as of May 6, 2022.  
747

# Figure 1

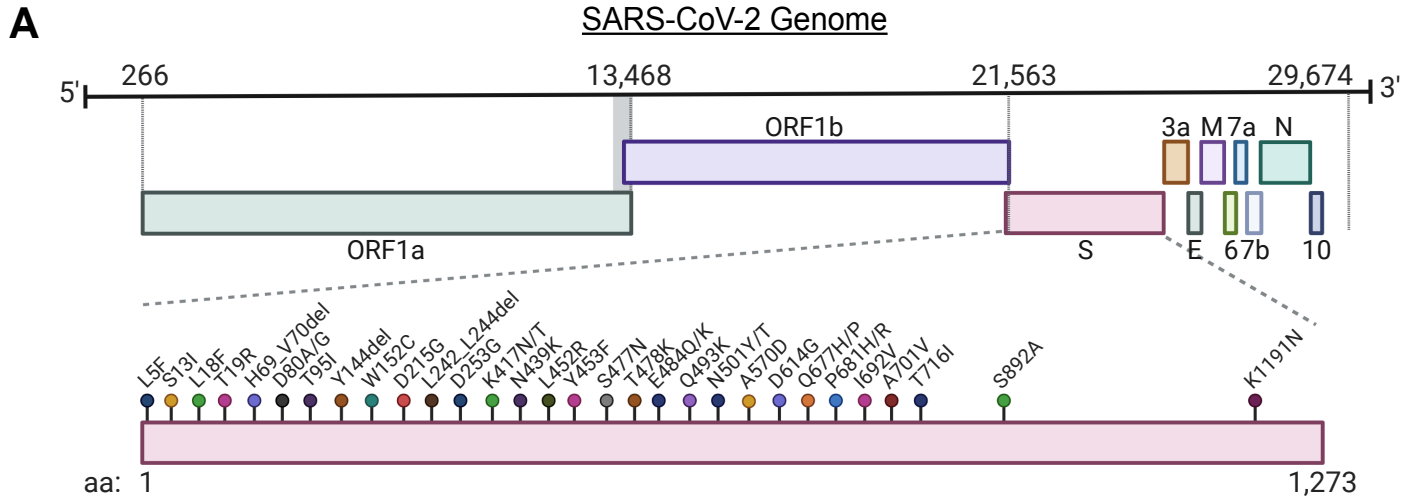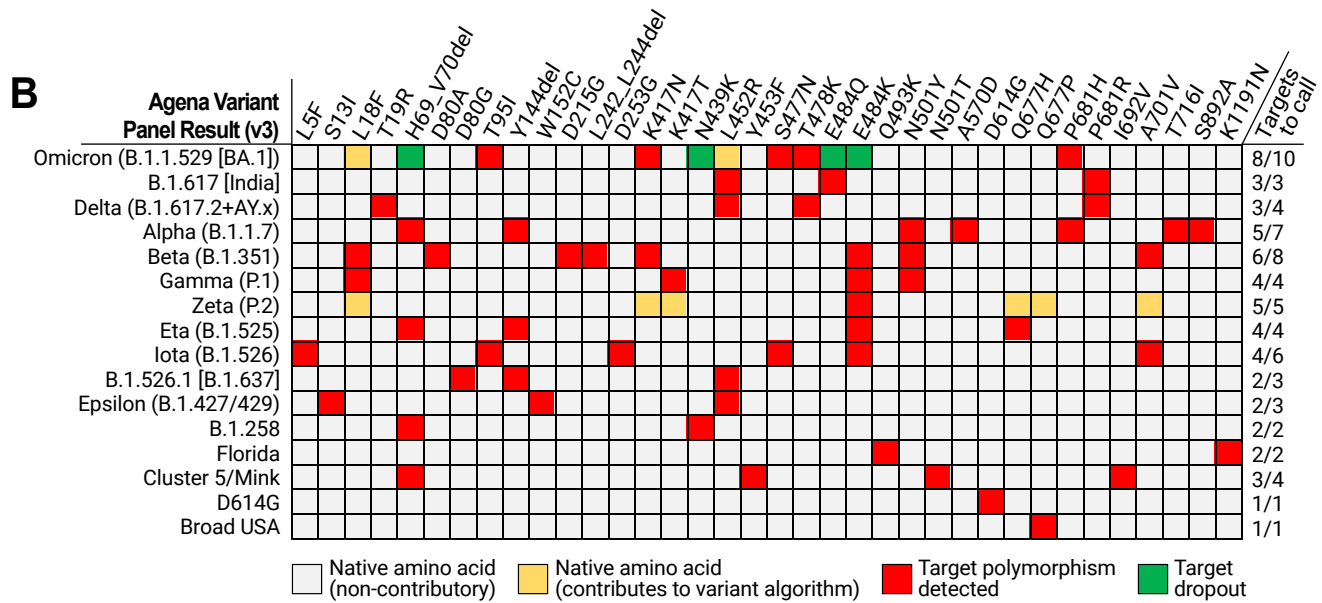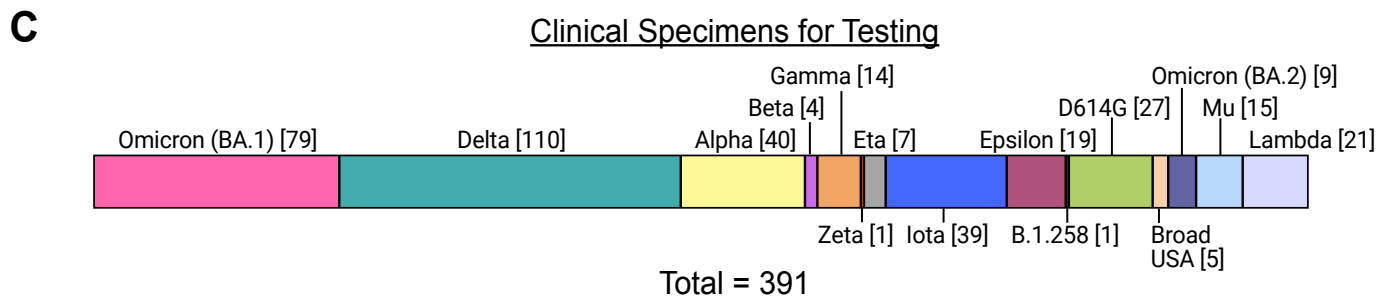

## Figure 2

### Variant Performance

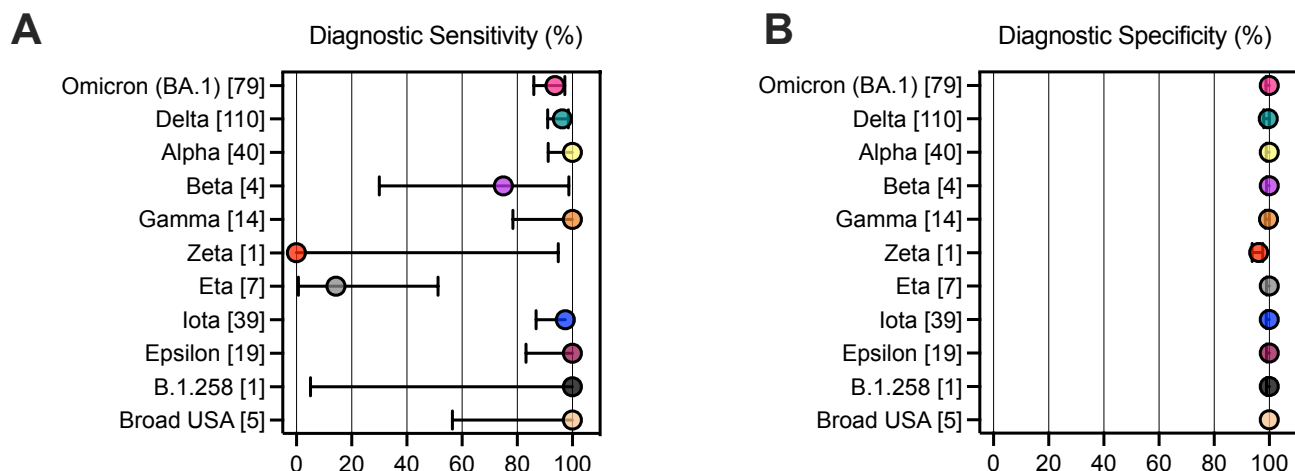

### Target Performance

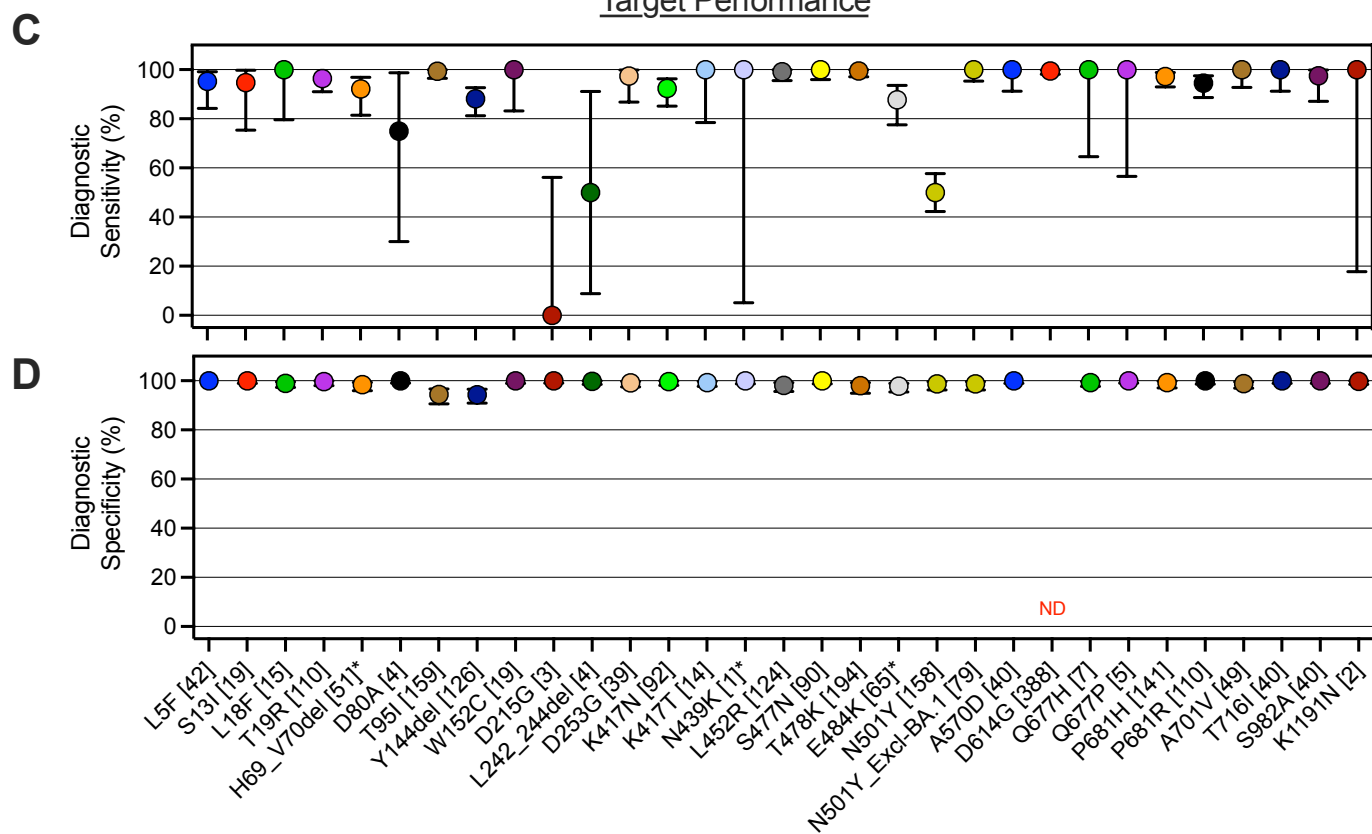

Source: https://medrxiv.org/content/10.1101/2022.05.28.22275691v1.full.pdf
